# Supplementary material for: Development and Validation of a Preoperative Glycolipid Metabolism-Based Nomogram for Predicting Postoperative Recurrence in Primary Glioma: A Retrospective Cohort Study
Source: Research Square preprint supplement (doi:10.21203/rs.3.rs-7872941/v1), 2025-10-31
Supplement: Supplementary file 1 [file 5a62e3889658138341ed7184.pdf]

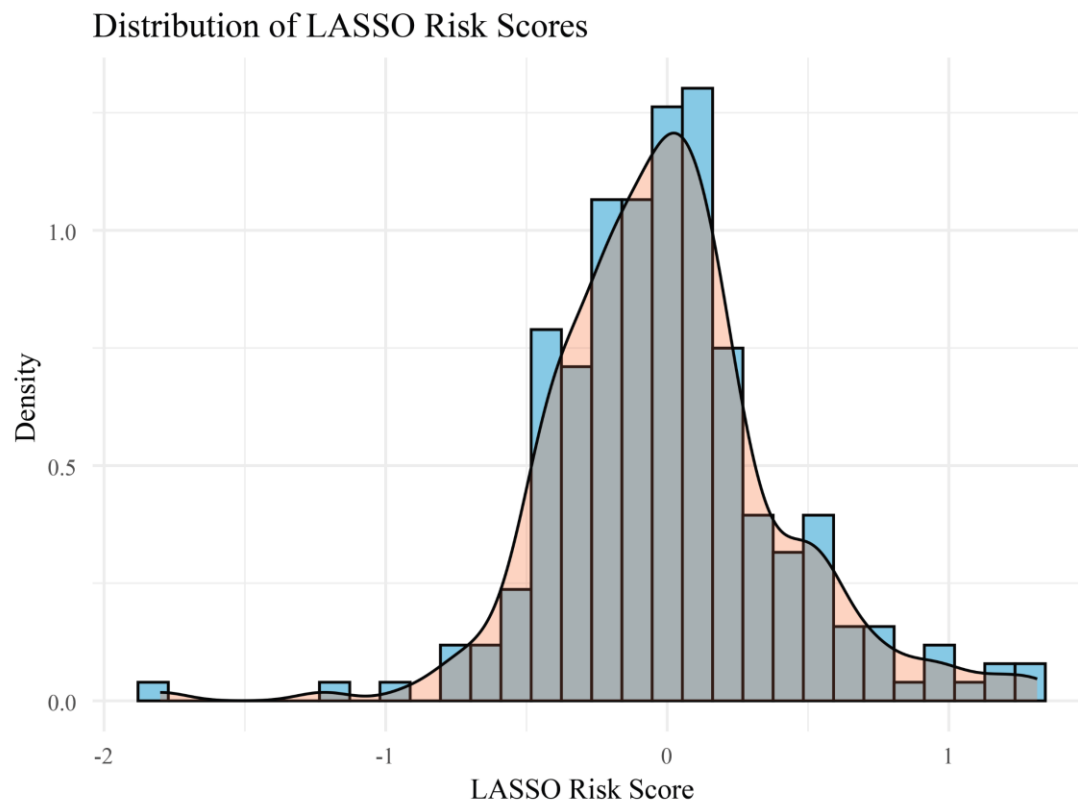

**Figure S1.** This figure displays the density distribution of LASSO scores across the entire study cohort. This distribution reflects the heterogeneity in preoperative metabolic risk within the patient population.

| Variable     | Estimate | S.E   | HR (95%CI)           | Z      | P      |
|--------------|----------|-------|----------------------|--------|--------|
| lasso_score  | 0.947    | 0.264 | 2.579 (1.537, 4.327) | 3.587  | <0.001 |
| Radiotherapy |          |       |                      |        |        |
| 0            | Ref      |       |                      |        |        |
| 1            | -0.517   | 0.220 | 0.596 (0.387, 0.919) | -2.345 | 0.019  |
| Ki67         |          |       |                      |        |        |
| 0            | Ref      |       |                      |        |        |
| 1            | 0.537    | 0.210 | 1.711 (1.134, 2.584) | 2.557  | 0.011  |
| APTT         | -0.047   | 0.032 | 0.954 (0.896, 1.015) | -1.488 | 0.137  |

**Figure S2.** Multivariate Cox proportional hazards regression analysis [of the](#) variable selection results.
