# Supplementary material for: Development and Validation of a Preoperative Glycolipid Metabolism-Based Nomogram for Predicting Postoperative Recurrence in Primary Glioma: A Retrospective Cohort Study
Source: Research Square preprint supplement (doi:10.21203/rs.3.rs-7872941/v1), 2025-10-31
Supplement: Supplementary file 1 [file f90c55e498d0157433f6865d.docx]

| **Characteristic** | **Internal Cohort (N=236)** | **External Validation Cohort (N=66)** | **p-value** |
| --- | --- | --- | --- |
| Age | 53.00[43.00,61.00] | 50.00[44.25,58.00] | 0.9135 |
| Gender: |  |  | 0.0980 |
| man | 120.00(50.85%) | 43.00(65.15%) |  |
| women | 116.00(49.15%) | 23.00(34.85%) |  |
| BMI | 24.52[22.67,26.45] | 24.83[22.95,26.83] | 0.8041 |
| Primary location |  |  | 0.0955 |
| Left frontal | 61.00(25.50%) | 12.00(18.18%) |  |
| Right frontal | 55.00(23.00%) | 15.00(22.73%) |  |
| Left temporal | 35.00(14.60%） | 8.00(12.12%) |  |
| Right temporal | 25.00（10.40%） | 7.00(10.61%) |  |
| Parietal | 21.00(8.70%) | 10.00(15.15%) |  |
| Occipital | 11.00(4.60%) | 3.00(4.55%) |  |
| Multiple occurrences | 21.00(8.70%) | 8.00(12.12%) |  |
| Other | 7.00(2.90%) | 3.00(4.55%) |  |
| Drink |  |  | 0.8791 |
| Yes | 37.00（15.70%） | 12.00(18.18%) |  |
| No | 199.00（84.30%） | 54.00(81.82%) |  |
| Smoke |  |  | 0.9427 |
| Yes | 42.00（17.70%） | 12.00(18.18%) |  |
| No | 194.00（82.20%） | 54.00(81.82%) |  |
| Pathological |  |  | 0.5466 |
| WHOⅡ | 51.00（21.60%） | 15.00(22.73%) |  |
| WHOⅢ | 124.00（52.50%） | 37.00（56.06%) |  |
| WHOⅣ | 61.00（25.80%） | 14.00(21.21%) |  |
| Chemotherapy |  |  | ＜0.0001 |
| Yes | 234.00(99.10%) | 54.00(81.82%) |  |
| No | 2.00(0.90%) | 12.00(18.18%) |  |
| Radiotherapy |  |  | 0.2378 |
| Yes | 148.00(62.70%) | 40.00（60.61%） |  |
| No | 68.00(37.30%) | 26.00（39.39%） |  |
| IDH1 |  |  | 0.0929 |
| Yes | 93.00(39.40%) | 22.00（33.33%） |  |
| No | 143.00(60.60%) | 44.00（66.67%） |  |
| MGMT |  |  | 0.7085 |
| Yes | 149.00（63.20%） | 40.00（60.61%） |  |
| No | 87.00（36.80%） | 26.00（39.39%） |  |
| Ki67 |  |  | 0.0520 |
| ≥10% | 93.00（39.40%） | 36.00（54.55%） |  |
| ＜10% | 143.00（60.60%） | 30.00（45.45%） |  |
| TBiL | 10.05[7.40,14.45] | 9.90[6.65,13.30] | 0.4913 |
| Albumin | 41.50[39.83,44.48] | 41.65[39.18,44.80] | 0.6766 |
| APTT | 35.25[32.53,37.80] | 35.10[32.30,36.60] | 0.1282 |
| Hb | 134.00[124.00,144.00] | 137.00[126.25,146.00] | 0.3320 |
| TG/HDL-c | 0.99[0.66,1.43] | 1.02[0.68,1.46] | 0.4429 |
| TC/HDL-c | 3.76[3.15,4.64] | 3.74[3.04,4.62] | 0.9218 |
| LDL-c/HDL-c | 2.56[2.01,3.33] | 2.53[1.91,3.33] | 0.9663 |
| ALT/HDL-c | 12.99[9.21,20.27] | 13.62[10.16,19.92] | 0.9693 |
| GGT/HDL-c | 16.35[11.09,26.33] | 20.48[11.46,29.77] | 0.3826 |
| TyG | 1.15[0.80.1.47] | 1.14[0.78,1.46] | 0.6291 |
| TyG-BMI | 27.45[18.68,36.47] | 28.85[18.97,37.95] | 0.7370 |
| LASSO-score | -0.015[-0.024,0.176] | -0.016[-0.240,0.206 | 0.8256 |
|  |  |  |  |

Table 1. Baseline clinicopathological characteristics of newly diagnosed glioma patients by recurrence status in the modeling cohort and external validation cohort.

Note: Data are presented as mean ± standard deviation, median (interquartile range), or n (%). Group comparisons were performed using Student's t-test, Mann–Whitney U test, chi-square test, or Fisher's exact test, as appropriate.
